# Supplementary material for: Preparation and Characterization of QPVA/PDDA Electrospun Nanofiber Anion Exchange Membranes for Alkaline Fuel Cells
Source: MDPI journal article supplement (doi:10.3390/nano12223965), 2022-11-10
Supplement: s1 [file s1]

# **Preparation and Characterization of QPVA/PDDA Electrospun Nanofiber Anion Exchange Membranes for Alkaline Fuel Cells**

Asep Muhamad Samsudin <sup>1,2,\*</sup>, Michaela Roschger <sup>1</sup>, Sigrid Wolf <sup>1</sup> and Viktor Hacker <sup>1</sup>

<sup>1</sup> Institute of Chemical Engineering and Environmental Technology, Graz University of Technology, 8020 Graz, Austria

<sup>2</sup> Department of Chemical Engineering, Diponegoro University, Semarang 50275, Indonesia

\* Correspondence: asepsamsudin@tugraz.at

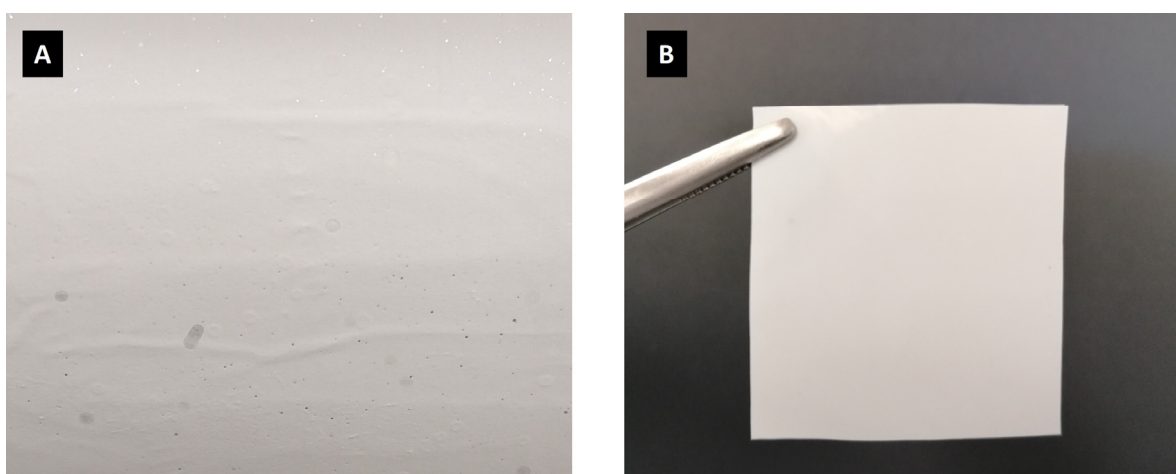

**Figure S1.** Electrospun QPVA with poor result (A) and good result (B).
